# Supplementary material for: Integrative Analysis of a Cross-Loci Regulation Network Identifies App as a Gene Regulating Insulin Secretion from Pancreatic Islets
Source: PubMed Central journal article supplement (PMC3516550; doi:10.1371/journal.pgen.1003107), 2012-12-06

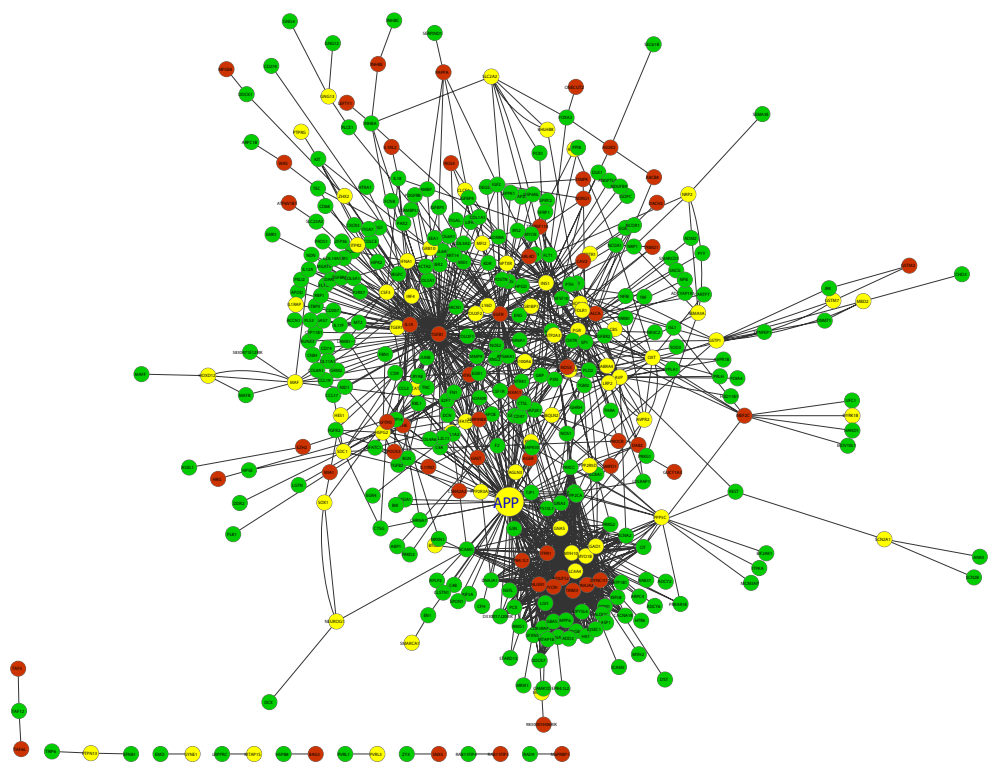

Supplement: pgen.1003107.s008.pdf [file pgen.1003107.s008.pdf]
