# Supplementary material for: Integrative Analysis of a Cross-Loci Regulation Network Identifies App as a Gene Regulating Insulin Secretion from Pancreatic Islets
Source: PLoS Genet. 2012 Dec 6;8(12):e1003107. doi: 10.1371/journal.pgen.1003107 (PMC3516550; doi:10.1371/journal.pgen.1003107)
Supplement: Table S5 — Ranks of genes with TIE scores in pancreatic islet. (XLSX) [file pgen.1003107.s013.xlsx]

## Sheet: Sheet1
GeneName	degree	hasKO_phenotype	num_pos_neighbors	num_pos_neighbors/degree	score_by_edge_weight/degree	TIE score	P-values
APP	102	1	44	0.431373	0.206171	0.78019	0
GRIA3	15	1	8	0.533333	0.250737	0.521392	0
GRB10	7	1	5	0.714286	0.322175	0.518521	0
PGR	33	0	23	0.69697	0.163424	0.512414	0
CALCA	13	0	8	0.615385	0.235571	0.489856	0
INS1	47	0	28	0.595745	0.146058	0.486694	0
HK1	14	1	7	0.5	0.244276	0.475339	0
ALDOC	14	0	7	0.5	0.243309	0.473458	0
ATP1B1	14	0	7	0.5	0.240088	0.467189	0
ADD2	14	0	7	0.5	0.239858	0.466742	0
DPYSL4	14	0	7	0.5	0.233783	0.454921	1.11022e-16
PYGB	14	0	7	0.5	0.232306	0.452046	2.22045e-16
IQSEC1	14	0	7	0.5	0.23222	0.45188	2.22045e-16
PRKCC	18	0	10	0.555556	0.192714	0.443739	7.77156e-16
LRP2	8	0	6	0.75	0.24394	0.437081	2.44249e-15
RIMS1	14	0	7	0.5	0.222789	0.433528	4.32987e-15
NEFL	15	0	8	0.533333	0.208395	0.433346	4.44089e-15
ITPR1	50	1	16	0.32	0.156231	0.433165	4.66294e-15
PRKG2	15	1	8	0.533333	0.208152	0.432839	4.88498e-15
CIT	16	1	8	0.5	0.204099	0.424411	1.87628e-14
SLC2A2	6	1	5	0.833333	0.258229	0.415604	7.4496e-14
DOCK7	15	0	7	0.466667	0.212282	0.413081	1.09912e-13
SDC1	11	0	7	0.636364	0.21213	0.412786	1.15019e-13
NCAM1	17	0	8	0.470588	0.198157	0.412056	1.28564e-13
MTAP1B	14	1	7	0.5	0.210742	0.410086	1.73861e-13
NCOA3	11	1	8	0.727273	0.19479	0.405055	3.72147e-13
MYO1B	53	0	17	0.320755	0.141909	0.402058	5.82867e-13
SLC25A13	14	0	7	0.5	0.200093	0.389362	3.74067e-12
HSPG2	13	1	9	0.692308	0.176767	0.388396	4.29745e-12
E2F1	10	1	6	0.6	0.215906	0.386851	5.36016e-12
AVP	22	0	10	0.454545	0.167464	0.385601	6.40588e-12
LASP1	14	0	7	0.5	0.197633	0.384577	7.40841e-12
CACNA1B	14	0	7	0.5	0.197175	0.383684	8.40694e-12
GSN	15	0	8	0.533333	0.18259	0.379685	1.47513e-11
SP1	26	1	15	0.576923	0.139611	0.378074	1.84657e-11
SLC4A4	48	1	14	0.291667	0.142063	0.374913	2.86045e-11
EPS15L1	15	0	8	0.533333	0.179718	0.373714	3.37347e-11
OXT	15	0	9	0.6	0.169813	0.373117	3.66138e-11
F2	12	0	7	0.583333	0.189782	0.369299	6.15967e-11
MYH10	58	1	17	0.293103	0.130022	0.36838	6.97532e-11
IFNA1	24	0	9	0.375	0.167499	0.368032	7.31046e-11
TJP1	17	0	9	0.529412	0.160457	0.352561	5.61174e-10
DPM1	14	0	7	0.5	0.177929	0.346235	1.25507e-09
ACHE	10	1	5	0.5	0.213607	0.343787	1.1014e-08
DNAJA1	15	1	7	0.466667	0.1688	0.328469	1.30765e-08
SFXN3	14	0	7	0.5	0.168054	0.327018	1.33762e-08
NLGN1	42	1	13	0.309524	0.12742	0.326826	3.81909e-08
PPP2CA	18	1	7	0.388889	0.16331	0.317786	5.22098e-08
GBAS	14	0	7	0.5	0.161896	0.315035	6.97559e-08
NFATC2	12	1	6	0.5	0.174388	0.31246	9.09242e-08
KNG2	8	0	4	0.5	0.223678	0.310084	1.72292e-07
IL1A	40	0	20	0.5	0.101566	0.304265	1.81848e-07
PLD2	5	0	4	0.8	0.219122	0.303768	4.06875e-07
CAMK2B	17	0	7	0.411765	0.152234	0.296234	7.51587e-07
SFTPD	7	1	4	0.571429	0.209438	0.290343	1.06397e-06
D330017J20RIK	14	0	7	0.5	0.14746	0.286943	2.08669e-06
CDK5RAP3	14	0	7	0.5	0.144005	0.280221	2.43717e-06
TGFB1	125	1	56	0.448	0.0692224	0.278644	2.84585e-06
TGFBR2	5	1	5	1	0.172147	0.27706	3.99776e-06
GNAS	59	1	20	0.338983	0.0913132	0.27355	5.65677e-06
GAST	12	0	5	0.416667	0.167705	0.26991	6.83252e-06
CSF3	17	0	7	0.411765	0.137676	0.267906	8.87573e-06
LGI1	14	0	7	0.5	0.136234	0.2651	1.12994e-05
DYNC1I1	43	0	14	0.325581	0.0994596	0.26248	2.37656e-05
MMP9	12	1	7	0.583333	0.13064	0.254213	2.38518e-05
PAPPA	5	1	3	0.6	0.231357	0.254172	4.03213e-05
DNAJA2	41	0	13	0.317073	0.0967424	0.248139	4.27546e-05
PCX	14	0	7	0.5	0.127167	0.247455	4.52342e-05
PPARG	12	1	6	0.5	0.137739	0.246795	8.03645e-05
PYCR1	41	0	13	0.317073	0.0935476	0.239945	8.13011e-05
JUNB	9	1	5	0.555556	0.148999	0.239804	8.93485e-05
TRIM3	41	0	13	0.317073	0.0930453	0.238656	8.93705e-05
EPB4.1L1	43	0	14	0.325581	0.0904313	0.238653	0.000107966
EGFR	60	1	27	0.45	0.0717071	0.236335	0.000110954
EGR1	12	1	5	0.416667	0.146634	0.235998	0.000127094
NOS2	14	0	6	0.428571	0.130772	0.234313	0.0002002
TNFSF10	5	0	4	0.8	0.164878	0.228569	0.000319154
MPP6	14	0	7	0.5	0.114338	0.222492	0.000400537
KCNA2	15	0	7	0.466667	0.112781	0.219461	0.000521318
NOS3	26	1	15	0.576923	0.0797182	0.215881	0.000662108
KIF5B	14	1	7	0.5	0.10924	0.212572	0.0011631
MAP2K1	13	1	6	0.461538	0.114147	0.204523	0.00317759
NDUFS2	41	0	13	0.317073	0.0737459	0.189155	0.00359979
CCL3	6	0	3	0.5	0.170344	0.187142	0.00371855
TNFRSF11B	6	1	4	0.666667	0.134614	0.186615	0.00384026
KDR	5	1	4	0.8	0.134235	0.186089	0.0048949
MAPK10	6	0	3	0.5	0.16573	0.182073	0.00507674
MMP14	7	1	4	0.571429	0.130896	0.18146	0.0050919
RBL1	6	1	3	0.5	0.165126	0.18141	0.00586281
APOE	7	1	5	0.714286	0.11123	0.179017	0.00876142
GAD1	50	1	15	0.3	0.0635078	0.171982	0.0161894
HIF1A	7	1	3	0.428571	0.146111	0.160519	0.0285957
PTH	6	1	3	0.5	0.135588	0.148959	0.029499
IGF2	6	1	3	0.5	0.134985	0.148296	0.0410344
MEF2C	9	1	5	0.555556	0.0876299	0.141035	0.0496023
IRF4	7	0	3	0.428571	0.12439	0.136657	0.058558
PPP5C	14	0	5	0.357143	0.0824414	0.132684	0.104077
FN1	14	1	5	0.357143	0.0731301	0.117698	0.133562
MAF	8	1	3	0.375	0.100544	0.110459	0.134129
INHBA	6	1	2	0.333333	0.159174	0.110331	0.149144
POU2F2	5	0	2	0.4	0.154479	0.107076	0.161481
AGER	7	1	4	0.571429	0.075426	0.104563	0.192628
KIT	5	1	2	0.4	0.142428	0.0987237	0.22583
DAB2	6	1	3	0.5	0.0847478	0.093105	0.240597
MYCN	5	1	3	0.6	0.0826126	0.0907592	0.25727
RPS6KA1	5	0	2	0.4	0.12725	0.0882027	0.265614
POU2F1	6	0	3	0.5	0.0791507	0.0869559	0.274955
NCOA1	6	1	3	0.5	0.0779015	0.0855835	0.413314
GSTP1	9	1	2	0.222222	0.0931117	0.0645401	0.434501
NOS1	8	1	2	0.25	0.0883136	0.0612143	0.461562
CRYAB	5	1	3	0.6	0.055207	0.0606511	0.466167
PXN	6	1	3	0.5	0.0417608	0.045879	1
AVPR2	5	1	1	0.2	0.0271398	0	1
IL18	5	0	1	0.2	0.11073	0	1
NPY	7	1	1	0.142857	0.0172846	0	1
S100A6	6	0	1	0.166667	0.00385233	0	0
